# Supplementary material for: Ethnic Issues and Disparities in Inflammatory Bowel Diseases: What Can We Learn from the Arab Population in Israel?
Source: MDPI journal article supplement (doi:10.3390/jpm13061008), 2023-06-17
Supplement: s1 [file s1]

**Table S1.** Comorbidities among the Crohn's disease subgroups .

| <b>Comorbidities: Crohn's Disease</b> | <b>Arabs<br/>1263 (%)</b> | <b>Jews<br/>11625 (%)</b> | <b>p-value</b> |
|---------------------------------------|---------------------------|---------------------------|----------------|
| CIHD                                  | 172 (13.6)                | 1613 (13.9)               | 0.802          |
| COPD                                  | 115 (9.1)                 | 1007 (8.7)                | 0.596          |
| Asthma                                | 186 (14.7)                | 1864 (16)                 | 0.228          |
| Chronic Kidney disease                | 114 (9)                   | 1157 (10)                 | 0.294          |
| Hypertension                          | 301 (23.8)                | 3231 (27.8)               | 0.003          |
| Diabetes Mellitus                     | 154 (12.2)                | 998 (8.6)                 | <0.001         |
| Dyslipidemia                          | 371 (29.4)                | 3692 (31.8)               | 0.083          |
| Obesity                               | 358 (28.3)                | 2511 (21.6)               | <0.001         |
| Fatty liver                           | 79 (6.3)                  | 990 (8.5)                 | 0.006          |
| CVA                                   | 30 (2.1)                  | 238 (2)                   | 0.438          |
| Cirrhosis                             | 22 (1.7)                  | 123 (1.1)                 | 0.029          |
| Dementia                              | 17 (1.3)                  | 345 (3)                   | 0.001          |
| Vitamin B12 Deficiency                | 31 (2.5)                  | 232 (2)                   | 0.273          |
| Folic acid deficiency                 | 314 (24.9)                | 3627 (31.2)               | <0.001         |
| Iron anemia deficiency                | 590 (46.7)                | 5442 (46.8)               | 0.947          |
| Vitamin D deficiency                  | 251 (19.9)                | 2786 (24)                 | 0.001          |
| Clostridium difficile infection       | 34 (2.7)                  | 277 (2.4)                 | 0.496          |
| Pneumonia                             | 333 (26.4)                | 3259 (28)                 | 0.209          |
| Depression                            | 160 (12.7)                | 2266 (19.5)               | <0.001         |
| Male infertility                      | 83 (6.6)                  | 292 (2.5)                 | <0.001         |
| Female infertility                    | 78 (6.2)                  | 898 (7.7)                 | 0.048          |
| Osteoporosis                          | 87 (6.9)                  | 888 (7.6)                 | 0.338          |
| Colon cancer                          | 14 (1.1)                  | 195 (1.7)                 | 0.128          |
| Rectal cancer                         | 1 (0.08)                  | 46 (0.4)                  | 0.076          |
| Lymphoma-non-Hodgkin                  | 9 (0.7)                   | 98 (0.8)                  | 0.628          |
| Lymphoma – Hodgkin                    | 5 (0.4)                   | 30 (0.3)                  | 0.371          |
| Melanoma                              | 2 (0.2)                   | 168 (1.4)                 | <0.001         |
| Basal cell carcinoma                  | 25 (2)                    | 1257 (10.8)               | <0.001         |
| Small bowel cancer                    | 1 (0.1)                   | 29 (0.2)                  | 0.233          |

CIHD=Chronic Ischemic Heart Disease, COPD=Chronic Obstructive Pulmonary Disease, CVA=Cerebrovascular Accident

**Table S2.** Comorbidities among ulcerative colitis patients.

| <b>Ulcerative colitis<br/>Comorbidities</b> | <b>Arabs<br/>n = 1461<br/>(%)</b> | <b>Jews<br/>10920<br/>(%)</b> | <b>p-value</b> |
|---------------------------------------------|-----------------------------------|-------------------------------|----------------|
| CIHD                                        | 203 (13.9)                        | 2019 (18.5)                   | <0.001         |
| COPD                                        | 115 (7.9)                         | 1018 (9.3)                    | 0.071          |
| Asthma                                      | 218 (14.9)                        | 1574 (14.4)                   | 0.605          |
| Chronic Kidney Disease                      | 107 (7.3)                         | 1251 (11.5)                   | <0.001         |
| Hypertension                                | 360 (24.6)                        | 3842 (35)                     | <0.001         |
| Diabetes Mellitus                           | 174 (11.9)                        | 1310 (12)                     | 0.924          |
| Dyslipidemia                                | 470 (32.2)                        | 4649 (42.6)                   | <0.001         |
| Obesity                                     | 424 (29)                          | 2509 (23)                     | <0.001         |
| Fatty liver                                 | 61 (4.2)                          | 925 (8.5)                     | <0.001         |
| CVA                                         | 31 (2.1)                          | 275 (2.5)                     | 0.359          |
| Cirrhosis                                   | 14 (1)                            | 136 (1.2)                     | 0.346          |

|                                 |            |             |        |
|---------------------------------|------------|-------------|--------|
| Dementia                        | 28 (1.9)   | 449 (4.1)   | <0.001 |
| Vitamin B12 Deficiency          | 19 (1.3)   | 160 (1.5)   | 0.620  |
| Folic acid deficiency           | 263 (18)   | 2638 (24.2) | <0.001 |
| Iron anemia deficiency          | 621 (42.5) | 4221 (38.7) | 0.005  |
| Vitamin D deficiency            | 285 (19.5) | 2481 (22.7) | 0.006  |
| Clostridium difficile infection | 30 (2.1)   | 301 (2.8)   | 0.118  |
| Pneumonia                       | 393 (26.9) | 3104 (28.4) | 0.224  |
| Depression                      | 172 (11.8) | 2112 (19.3) | <0.001 |
| Male infertility                | 76 (5.2)   | 235 (2.2)   | <0.001 |
| Female infertility              | 116 (7.9)  | 742 (6.8)   | 0.106  |
| Osteoporosis                    | 84 (5.7)   | 853 (7.8)   | 0.005  |
| Colon cancer                    | 20 (1.4)   | 236 (2.2)   | 0.046  |
| Rectal cancer                   | 4 (0.3)    | 78 (0.7)    | 0.051  |
| Lymphoma-non-Hodgkin            | 5 (0.3)    | 81 (0.7)    | 0.084  |
| Lymphoma—Hodgkin                | 1 (0.07)   | 21 (0.2)    | 0.291  |
| Melanoma                        | 6 (0.4)    | 199 (1.8)   | <0.001 |
| Basal cell carcinoma            | 31 (2.1)   | 1442 (13.2) | <0.001 |
| Small bowel cancer              | 6 (0.4)    | 40 (0.4)    | 793    |

CIHD=Chronic Ischemic Heart Disease, COPD=Chronic Obstructive Pulmonary Disease, CVA=Cerebrovascular Accident
